# Supplementary material for: A flexible and bright surface-enhanced electrochemiluminescence film constructed from efficient aggregation-induced emission luminogens for biomolecular sensing
Source: Royal Society of Chemistry journal article supplement (doi:10.1039/d2tb00400c), 2022-01-01
Supplement: d2tb00400c1.pdf [file d2tb00400c1.pdf]

Supporting Information for

**Flexible and bright surface-enhanced electrochemiluminescence film constructed from efficient aggregation-induced emission luminogens for biomolecules sensing**

Zihua Li,<sup>\*,a</sup> Yusheng Zhou,<sup>a</sup> Yuhan Cui<sup>a</sup> and Guodong Liang<sup>\*,a</sup>

<sup>a</sup>*PCFM Lab, School of Materials Science and Engineering, Sun Yat-Sen University, Guangzhou, 510275, China.*

\* Corresponding authors: Dr. Zihua Li and Prof. Guodong Liang

E-mail address: lizh259@mail2.sysu.edu.cn; lgdong@mail.sysu.edu.cn

## Supplementary figures

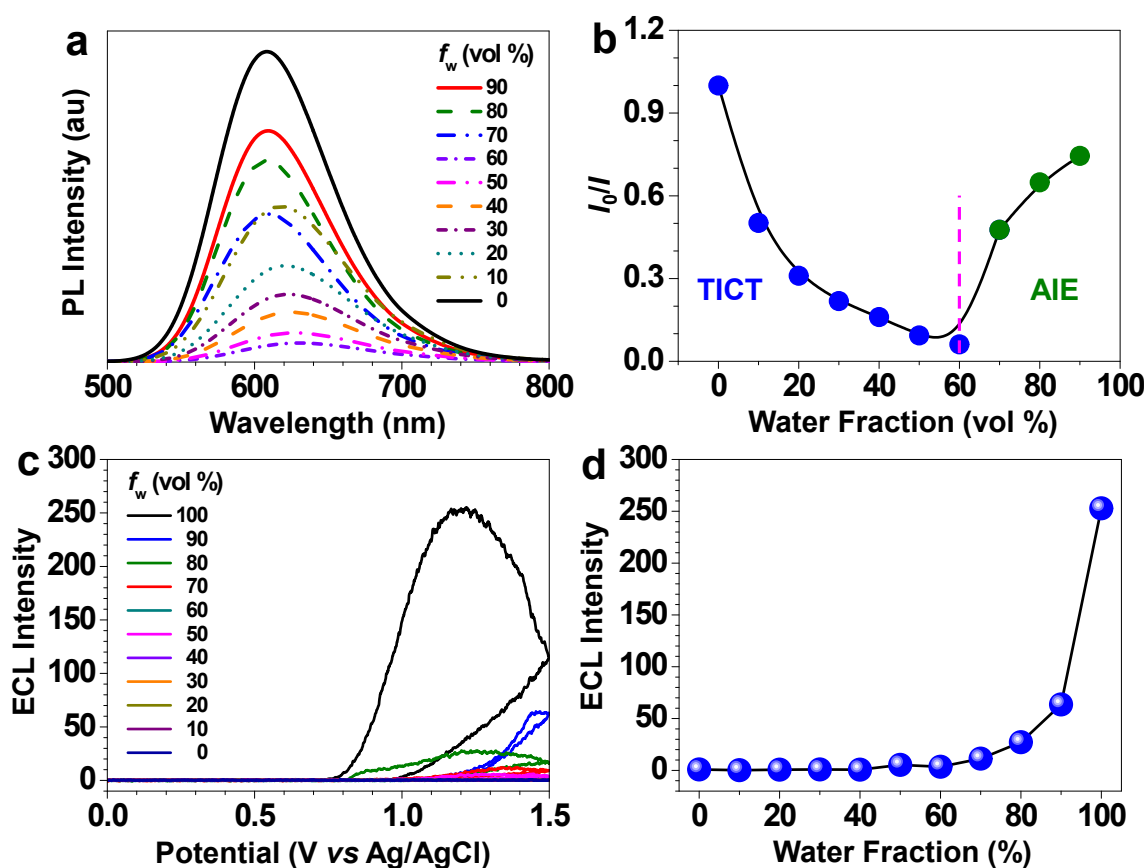

**Figure S1.** (a) Fluorescence spectra and (b) the plot of the relative fluorescence intensity ( $I/I_0$ ) of AIEgen in THF/H<sub>2</sub>O mixed solvents.  $I_0$ : emission intensity in pure THF. Excitation: 460 nm. (c) ECL-potential profiles of the AIEgen film on GCE in THF/H<sub>2</sub>O mixed solvents. (d) Plot of ECL intensity against water fraction.

It is noted that PL intensity of the AIEgen (BTD-TPA) is strongest in pure THF (Figure S1a,b), while ECL signal is not detected in pure THF solutions using glassy carbon (Figure S1c,d). PL spectra of the AIEgen/THF solution are excited by UV light. Most of AIEgen molecules are excited and involved in light emission, leading to strong PL intensity. In contrast, ECL of AIEgen/THF solution is triggered by electrochemical reactions near the electrode surface. AIEgen concentration near electrode surface is low in the AIEgen/THF solution, leading to low concentration of excited AIEgen molecules and faint ECL.

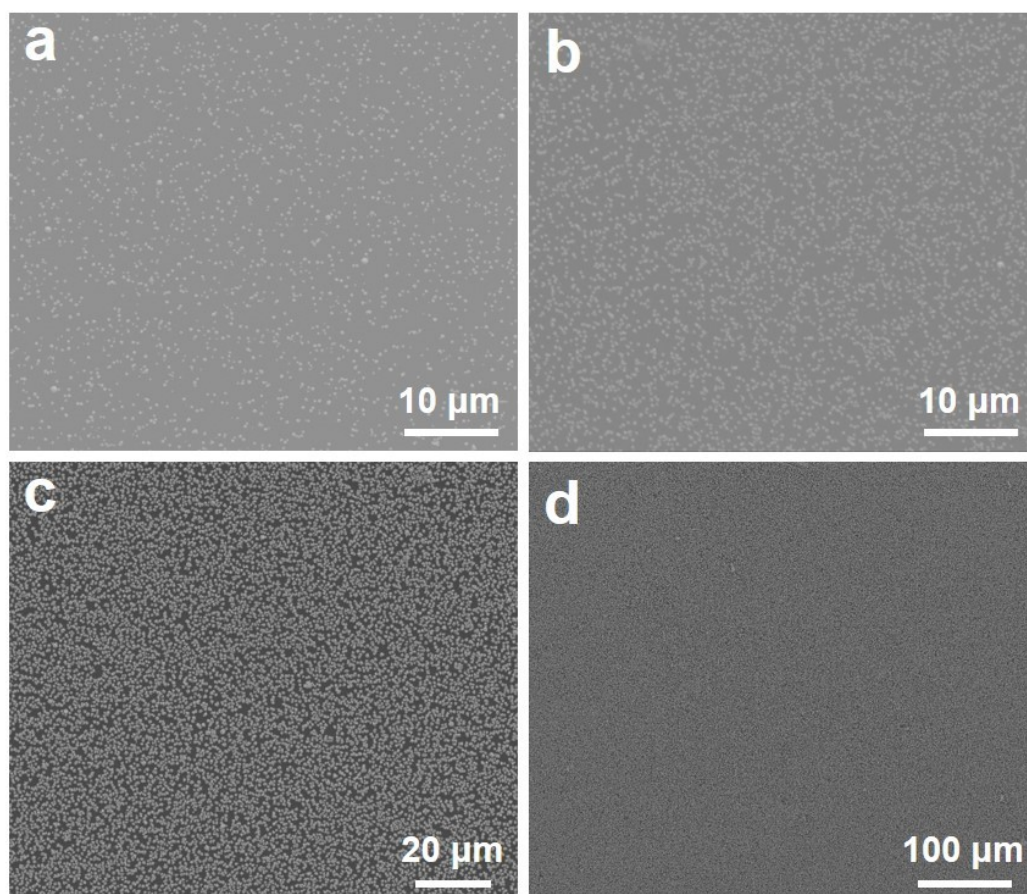

**Figure S2.** Low-magnification SEM images of AuNPs electrochemically deposited on GCE at different deposited cycles. (a) 1 cycle, (b) 20 cycles, (c) 50 cycles, and (d) 100 cycles.

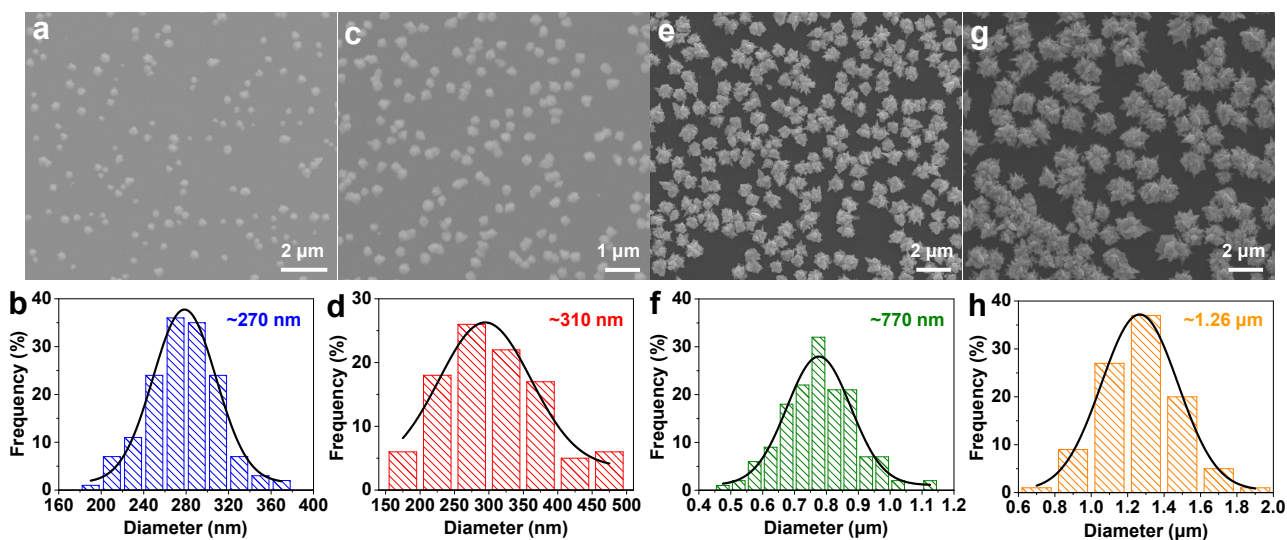

**Figure S3.** High-magnification SEM images and diameter distribution of AuNPs electrochemically deposited on GCE at different deposited cycles. (a) and (b) 1 cycle, (c) and (d) 20 cycles, (e) and (f) 50 cycles, (g) and (h) 100 cycles.

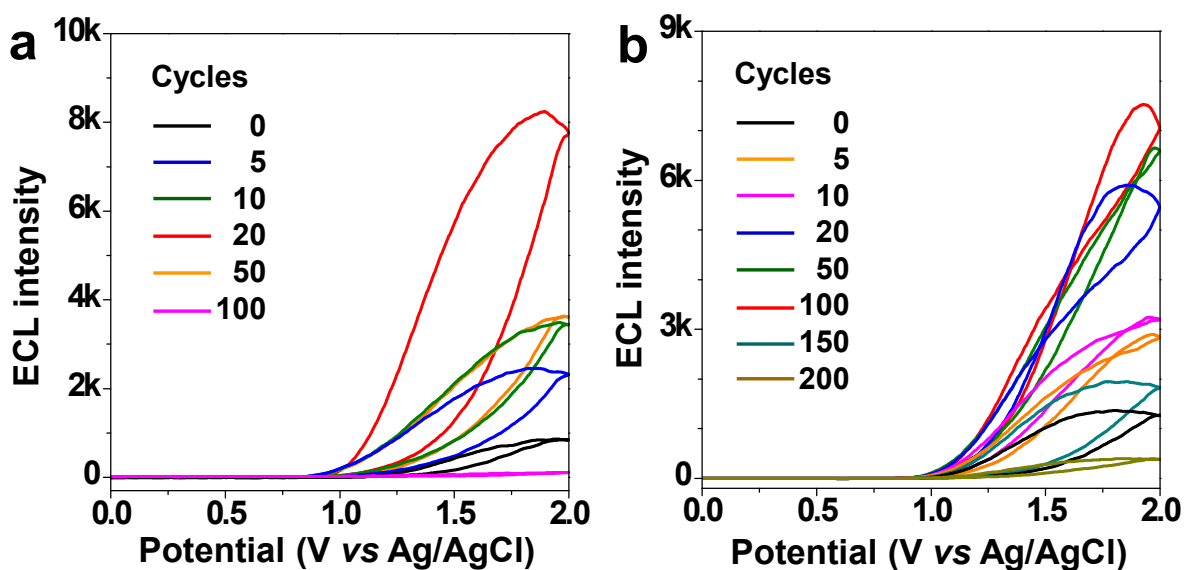

**Figure S4.** ECL-potential profiles of the AIEgen film on (a) GCFC, and (b) GCFP at different electrodeposition cycles in 0.2 M of PBS solution containing 300 mM of TEOA, pH = 8.

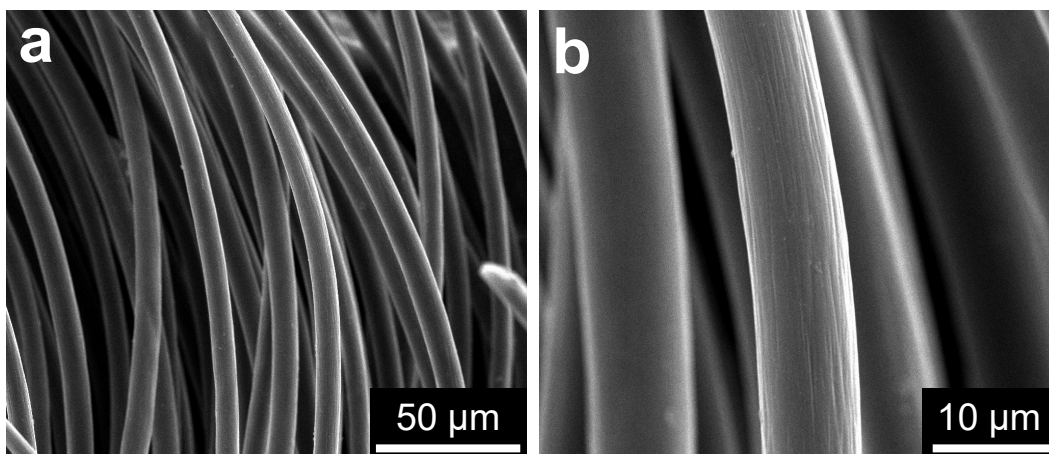

**Figure S5.** (a) Low-magnification and (b) high-magnification SEM images of bare CFC.

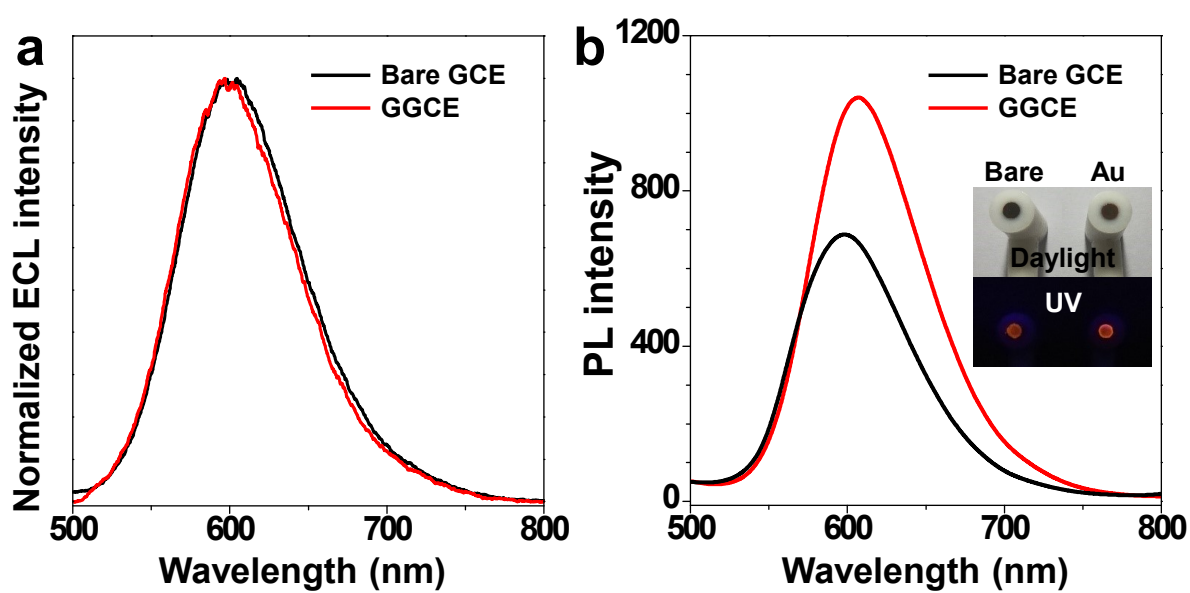

**Figure S6.** (a) Normalized ECL and (b) PL spectra of the AIEgen film on bare GCE and GGCE at 20 deposited cycles. Inset: digital photos under daylight and UV illumination (365 nm).

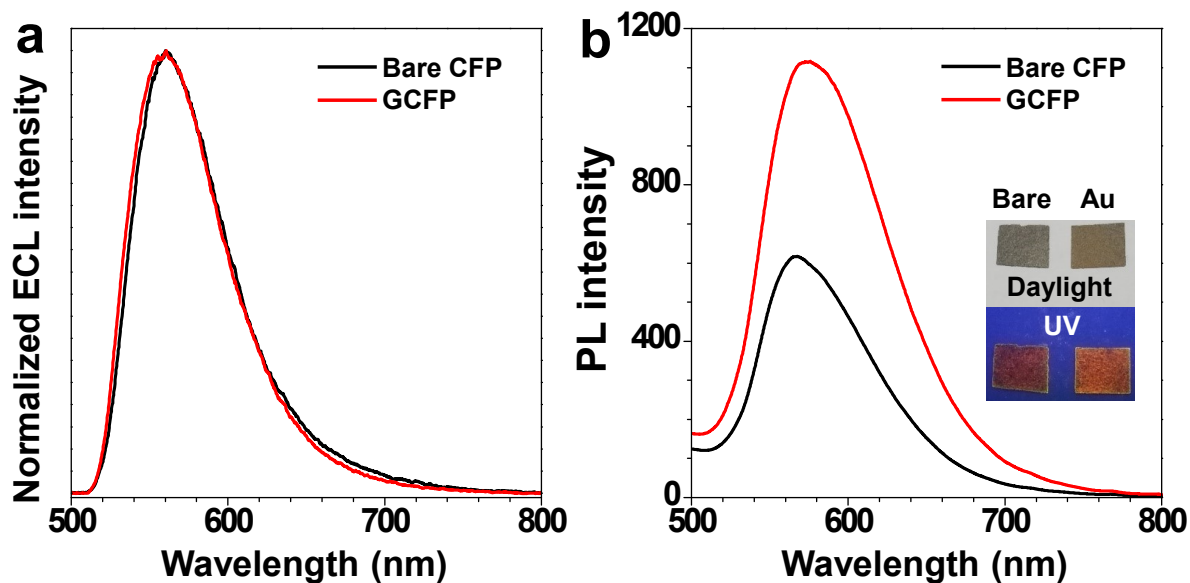

**Figure S7.** (a) Normalized ECL and (b) PL spectra of the AIEgen film on bare CFP and GCFP at 20 deposited cycles. Inset: digital photos under daylight and UV illumination (365 nm).

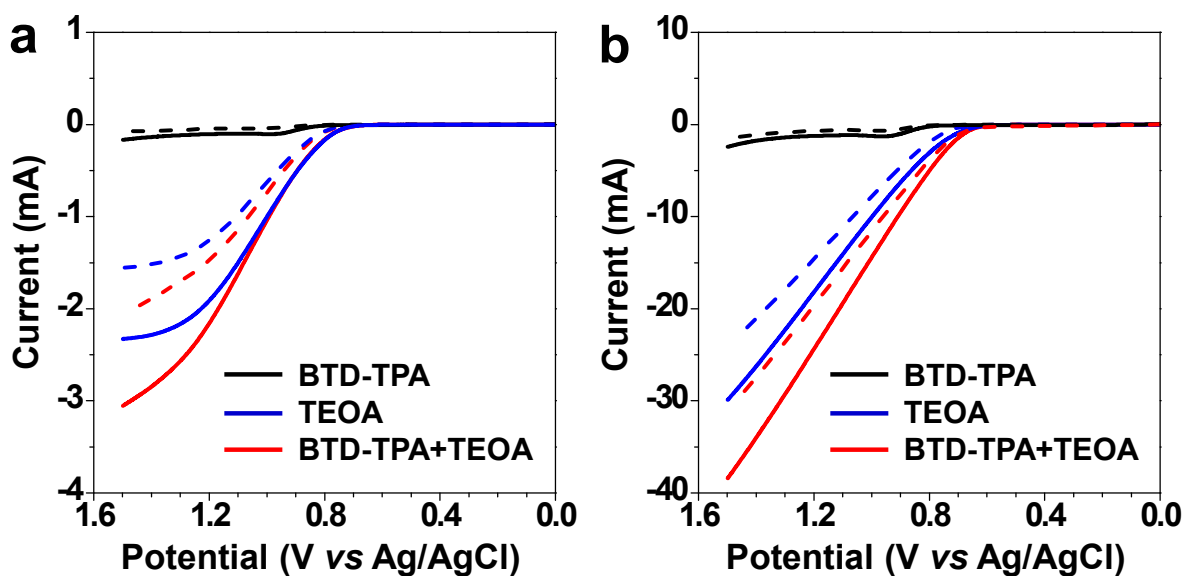

**Figure S8.** LSVs of the AIEgen film ( $156 \text{ ng/mm}^2$ ), TEOA (300 mM), and their mixture using (a) bare GCE (dot line) and GGCE (20 cycles, solid line) and (b) bare CFP (dot line) and GCFP (100 cycles, solid line).

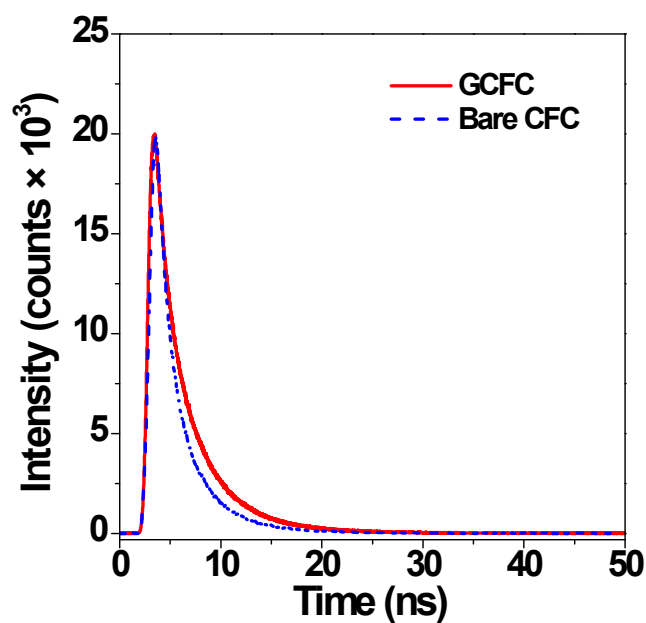

**Figure S9.** Time-resolved photoluminescence spectra of the AIEgen film on GCFC (20 deposition cycles) and bare CFC.

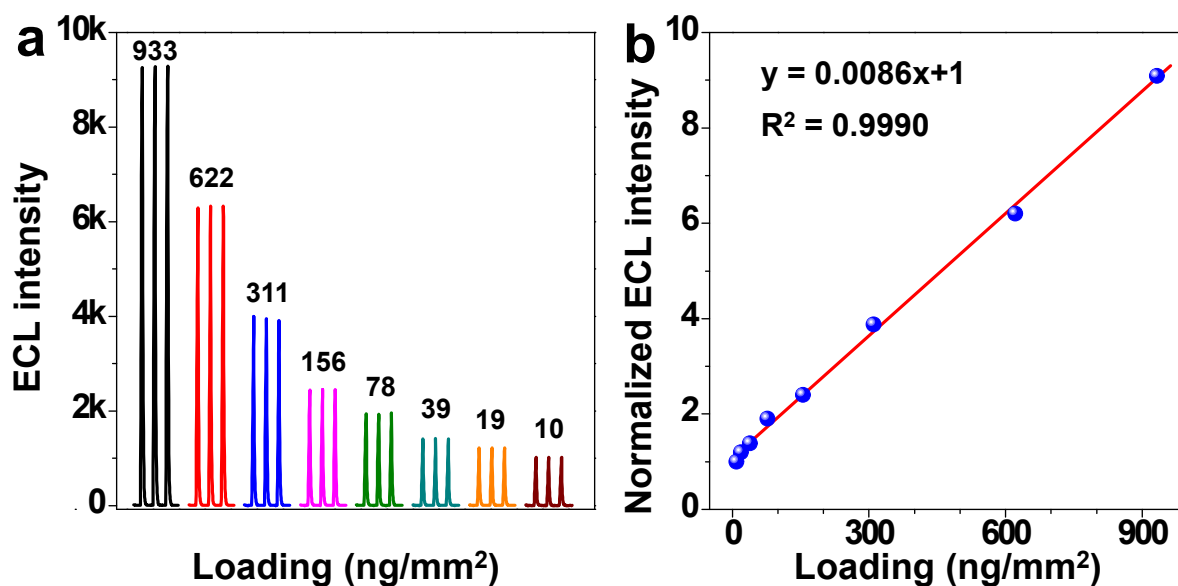

**Figure S10.** ECL intensity of the AIEgen film at various loadings on GCFC (20 deposition cycles).

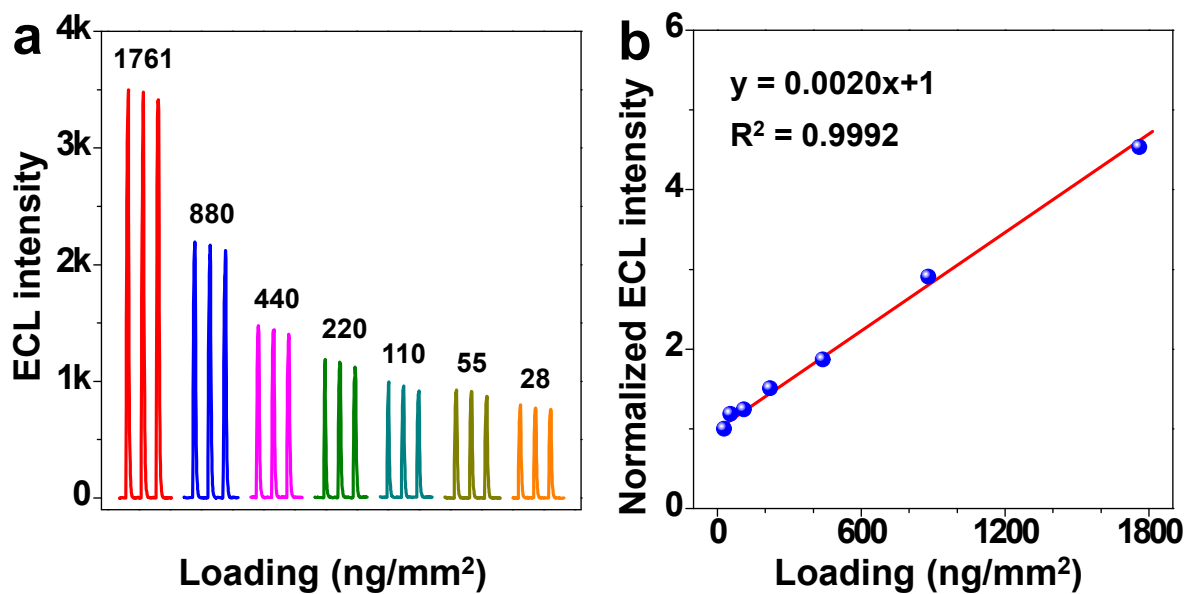

**Figure S11.** ECL intensity of the AIEgen film at various loadings on GGCE (20 deposition cycles).

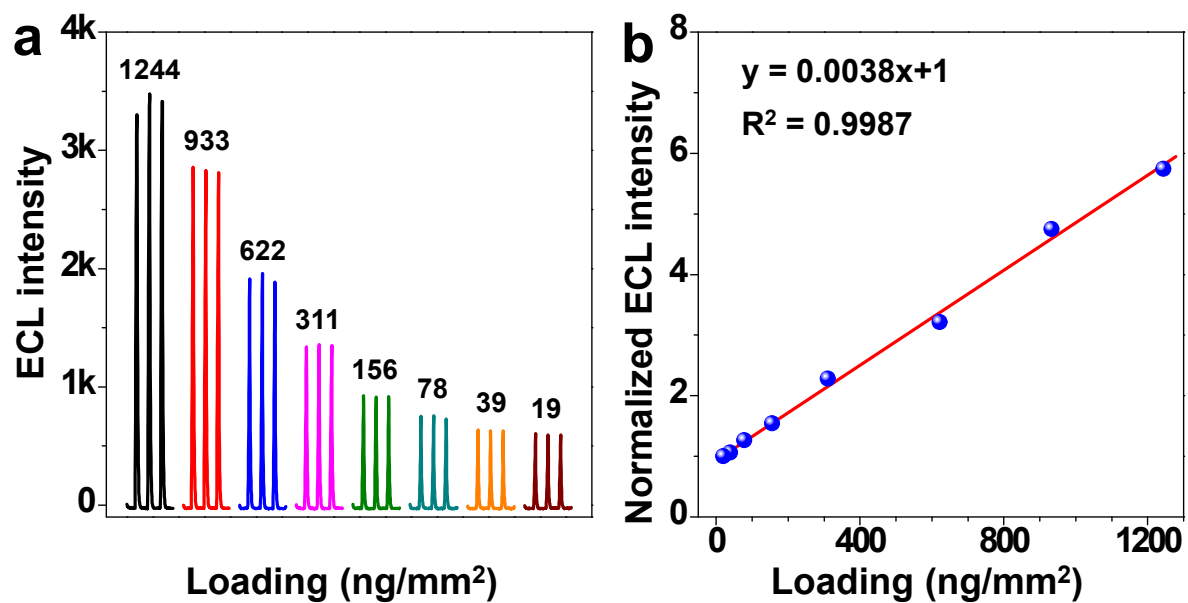

**Figure S12.** ECL intensity of the AIEgen film at various loadings on GCFP (100 deposition cycles).



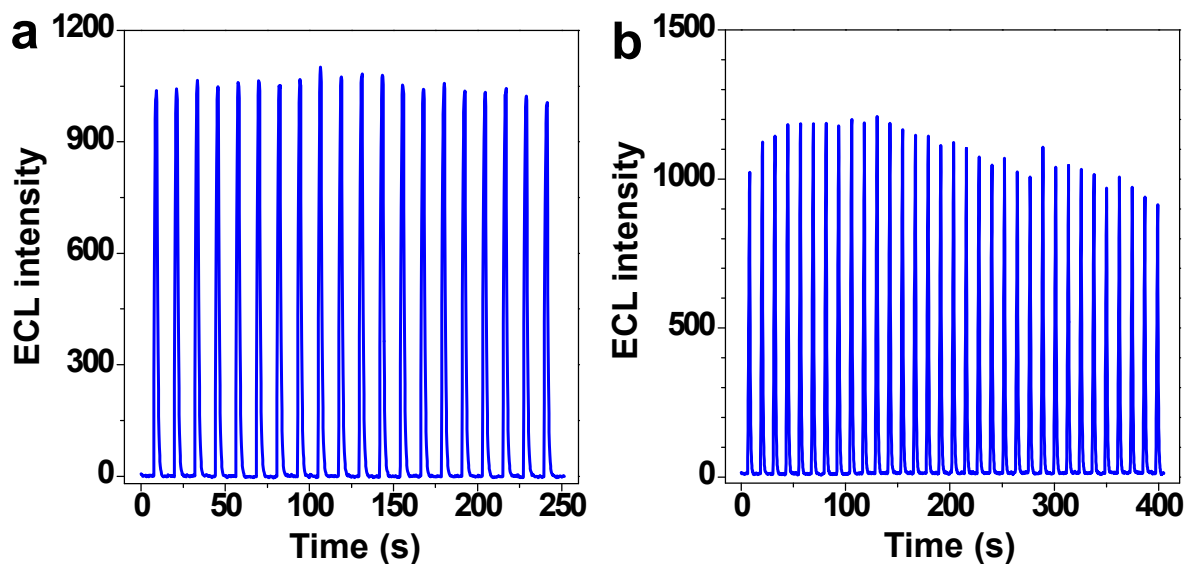

**Figure S13.** ECL stability of the AIEgen film on (a) GCFP (100 deposition cycles) and (b) GGCE (20 deposition cycles).

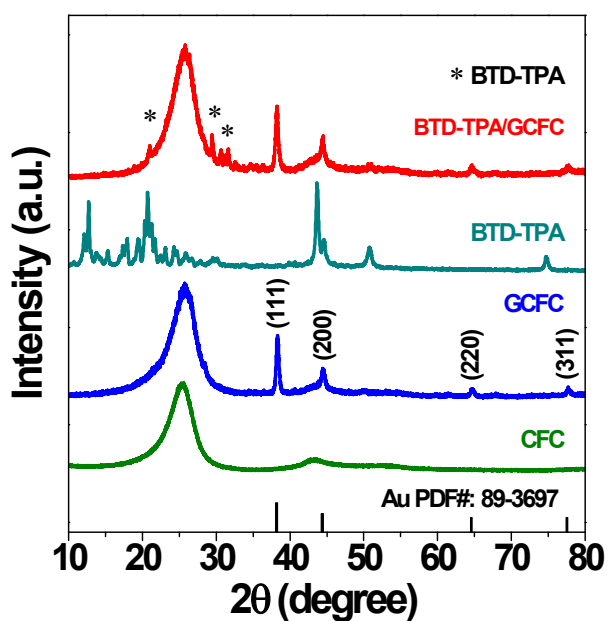

**Figure S14.** XRD patterns of CFC, GCFC, the AIEgen (BTD-TPA), and the AIEgen film on GCFC.

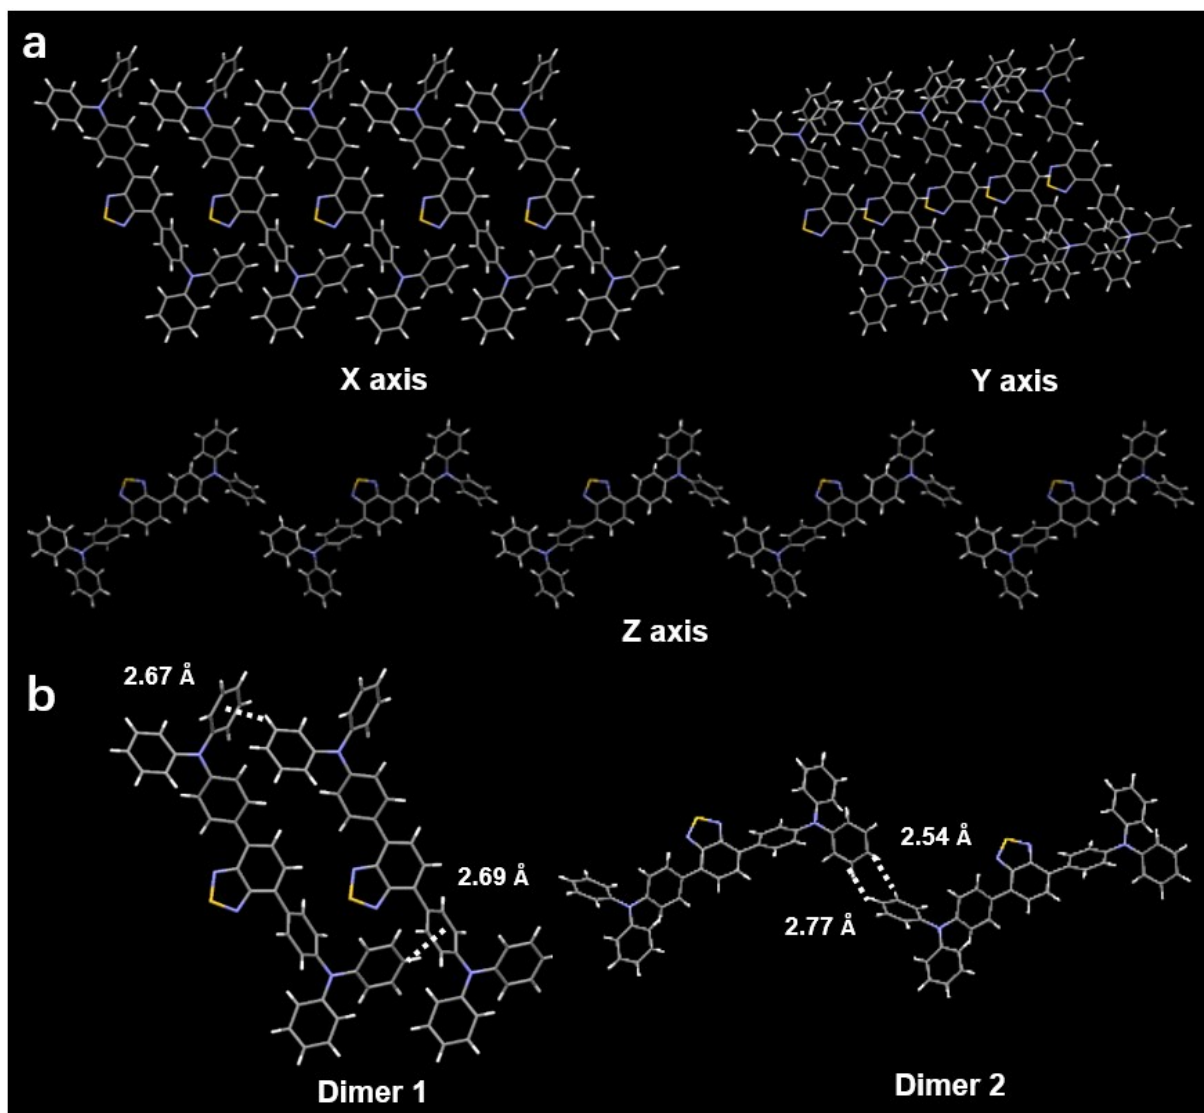

**Figure S15.** Crystal structures of the AIEgen (BTD-TPA). (a) View along X, Y, and Z axes, respectively. (b) Interaction between adjacent molecules.

**Table S1** Comparison of the present research with other reported ECL sensors for detection of DA.

| <b>Luminogens/Electrodes</b>                                    | <b>Linear range<br/>(M)</b>                                               | <b>LOD<br/>(M)</b>                       | <b>Reference</b> |
|-----------------------------------------------------------------|---------------------------------------------------------------------------|------------------------------------------|------------------|
| MIECLS/GCE <sup>[a]</sup>                                       | $1.0 \times 10^{-14}$ - $1.0 \times 10^{-6}$                              | $2.0 \times 10^{-15}$                    | 1                |
| ZnSe/GO@MWNTs/Ru(bpy) <sub>3</sub> <sup>2+</sup> <sup>[b]</sup> | $1.0 \times 10^{-9}$ - $1.0 \times 10^{-5}$                               | $6.0 \times 10^{-8}$                     | 2                |
| Au-WS <sub>2</sub> /GE <sup>[c]</sup>                           | $5.0 \times 10^{-9}$ - $2.0 \times 10^{-4}$                               | $3.23 \times 10^{-9}$                    | 3                |
| Pd NCs/GCE <sup>[d]</sup>                                       | $1.0 \times 10^{-12}$ - $1.0 \times 10^{-8}$                              | $4.6 \times 10^{-13}$                    | 4                |
| WO <sub>x</sub> QDs/GCE <sup>[e]</sup>                          | $1.0 \times 10^{-15}$ - $1.0 \times 10^{-5}$                              | $1.0 \times 10^{-15}$                    | 5                |
| TBPE-CMPs/GCE <sup>[f]</sup>                                    | $1.0 \times 10^{-9}$ - $1.0 \times 10^{-3}$                               | $8.5 \times 10^{-10}$                    | 6                |
| Eu <sup>3+</sup> -Cu NCs/GCE <sup>[g]</sup>                     | $1.0 \times 10^{-11}$ - $5.0 \times 10^{-4}$                              | $1.0 \times 10^{-11}$                    | 7                |
| Luminol-DO/ITO <sup>[h]</sup>                                   | $1.0 \times 10^{-12}$ - $1.0 \times 10^{-10}$                             | $1.0 \times 10^{-10}$                    | 8                |
| Ru(bpy) <sub>3</sub> <sup>2+</sup> /ITO                         | $2.5 \times 10^{-7}$ - $2.0 \times 10^{-5}$                               | $2.28 \times 10^{-7}$                    | 9                |
| Luminol-DO/GCE                                                  | $1.0 \times 10^{-12}$ - $1.0 \times 10^{-8}$                              | $5.2 \times 10^{-12}$                    | 10               |
| C545T MRs/GCE <sup>[i]</sup>                                    | $2.0 \times 10^{-8}$ - $4.0 \times 10^{-6}$                               | $5.19 \times 10^{-9}$                    | 11               |
| TPB NCs/GCE <sup>[j]</sup>                                      | $5.0 \times 10^{-9}$ - $1.0 \times 10^{-5}$                               | $3.1 \times 10^{-9}$                     | 12               |
| PEDOT-hosted Ag NCs/GCE <sup>[k]</sup>                          | $1.0 \times 10^{-9}$ - $1.0 \times 10^{-2}$                               | $1.7 \times 10^{-10}$                    | 13               |
| Ru(bpy) <sub>3</sub> <sup>2+</sup> /CNQD/GCE <sup>[l]</sup>     | $1.0 \times 10^{-6}$ - $1.0 \times 10^{-3}$                               | $5.0 \times 10^{-7}$                     | 14               |
| <b>AIegen film/GCFC</b>                                         | <b><math>1.0 \times 10^{-15}</math> - <math>1.0 \times 10^{-6}</math></b> | <b><math>3.16 \times 10^{-16}</math></b> | <b>This work</b> |

<sup>[a]</sup>MIECLS: A quenching-type electrochemiluminescence sensor consist of upconversion nanoparticles, COFs-based ECL enhancement material and oligoaniline-crosslinked gold nanoparticles imprinting recognition sites. <sup>[b]</sup>ZnSe/GO@MWNTs/Ru(bpy)<sub>3</sub><sup>2+</sup>: ZnSe quantum dots/graphene oxide@multiwalled carbon nanotubes/Ru(bpy)<sub>3</sub><sup>2+</sup>. <sup>[c]</sup>Au-WS<sub>2</sub>/GE: Au nanoparticles-WS<sub>2</sub> nanosheets/gold electrode. <sup>[d]</sup>Pd NCs: Pd nanocones. <sup>[e]</sup>WO<sub>x</sub> QDs: tungsten oxide quantum dots. <sup>[f]</sup>TBPE-CMPs: 1,1,2,2-tetrakis(4-bromophenyl)ethane (TBPE)-based conjugated microporous polymers. <sup>[g]</sup>Eu<sup>3+</sup>-Cu NCs: Europium(III)-doped copper nanoclusters. <sup>[h]</sup>Luminol-DO: Luminol-Dissolved Oxygen. <sup>[i]</sup>C545T MRs: organic microrods of 2,3,6,7-tetrahydro-1,1,7,7,-tetramethyl-1H,5H,11H-10-(2-benzothiazolyl)quinolizino-[9,9a,1gh] coumarin. <sup>[j]</sup>TPB NCs: tetraphenyl-1,3-butadiene nanocrystals. <sup>[k]</sup>PEDOT-hosted Ag NCs: poly(3,4-ethylenedioxythiophene)-hosted Ag nanoclusters. <sup>[l]</sup>CNQD: carbon nitride quantum dots.

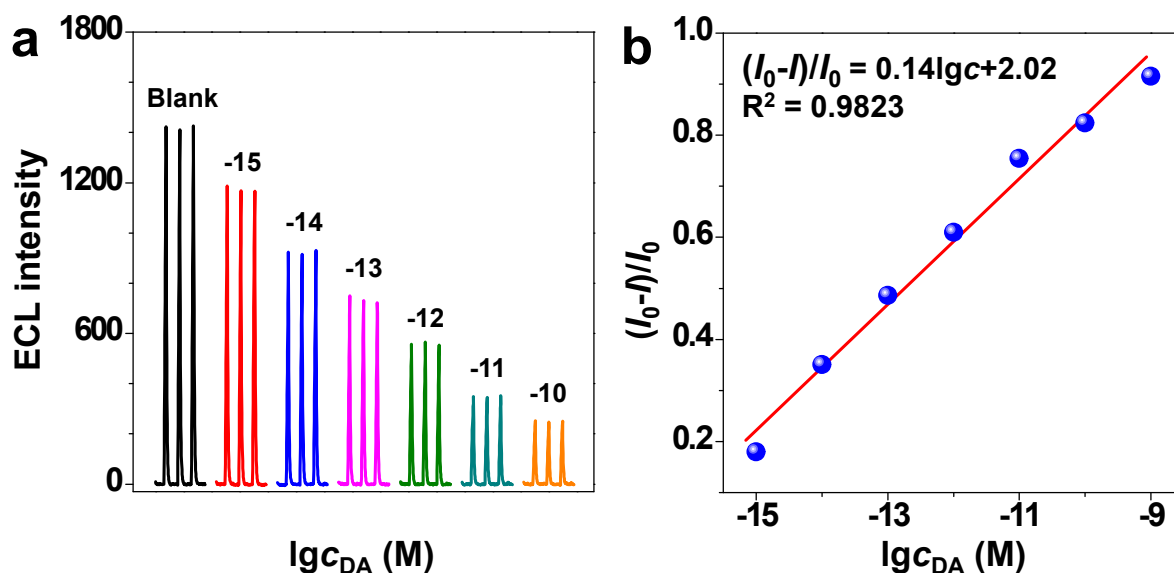

**Figure S16.** (a) ECL intensities of the AIEgen film (loading: 39 ng/mm<sup>2</sup>) on GCFC (20 deposition cycles) in the presence of various concentrations of DA. (b) Plot of  $(I_0 - I)/I_0$  value against the logarithm of DA concentrations.

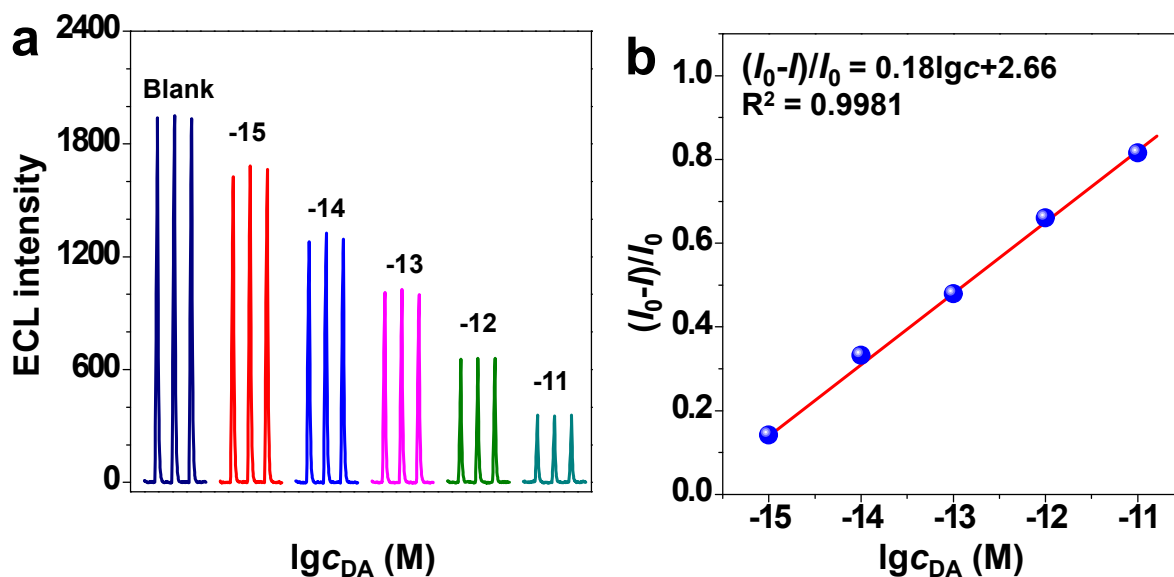

**Figure S17.** (a) ECL intensities of the AIEgen film (loading: 78 ng/mm<sup>2</sup>) on GCFC (20 deposition cycles) in the presence of various concentrations of DA. (b) Plot of  $(I_0 - I)/I_0$  value against the logarithm of DA concentrations.

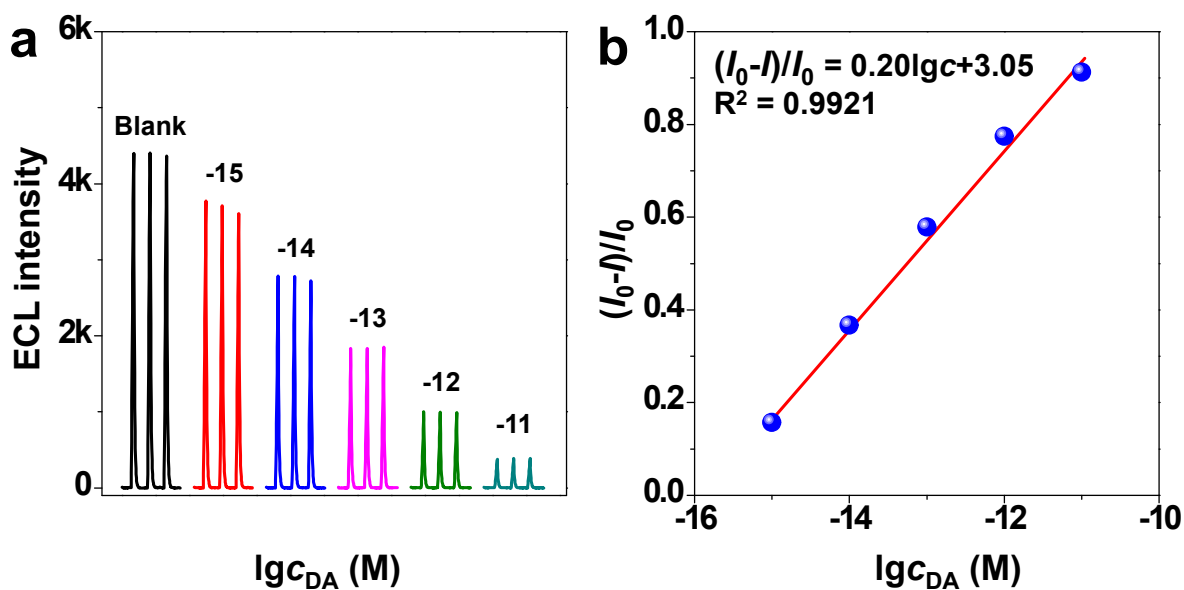

**Figure S18.** (a) ECL intensities of the AIEgen film (loading: 311 ng/mm<sup>2</sup>) on GCFC (20 deposition cycles) in the presence of various concentrations of DA. (b) Plot of  $(I_0 - I)/I_0$  value against the logarithm of DA concentrations.

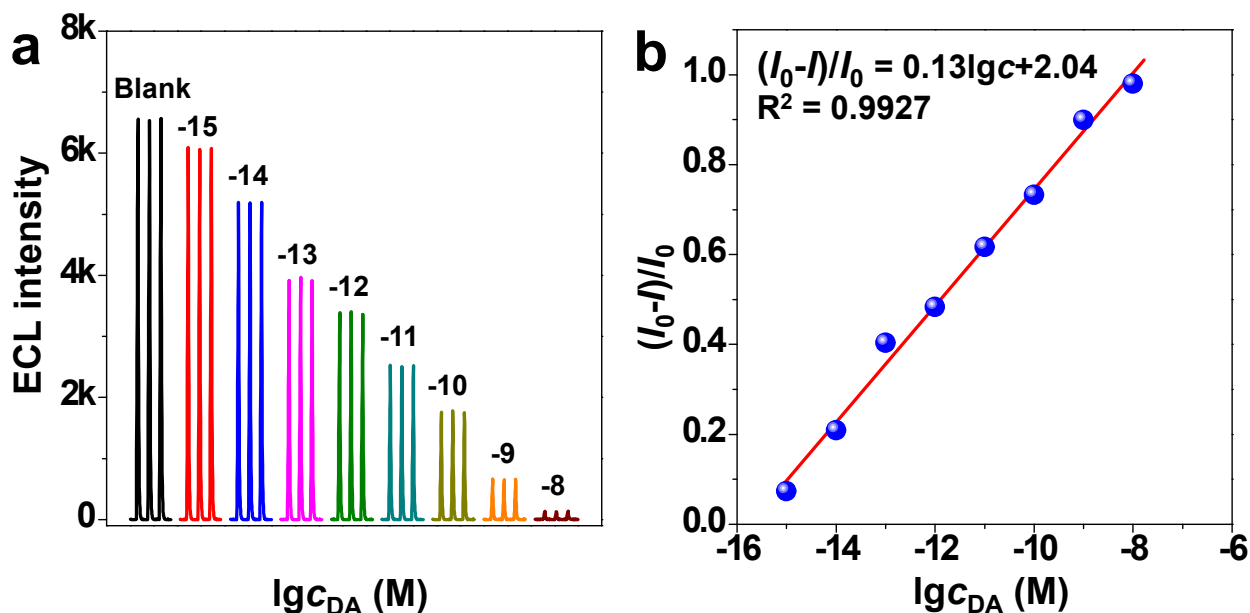

**Figure S19.** (a) ECL intensities of the AIEgen film (loading: 622 ng/mm<sup>2</sup>) on GCFC (20 deposition cycles) in the presence of various concentrations of DA. (b) Plot of  $(I_0 - I)/I_0$  value against the logarithm of DA concentrations.

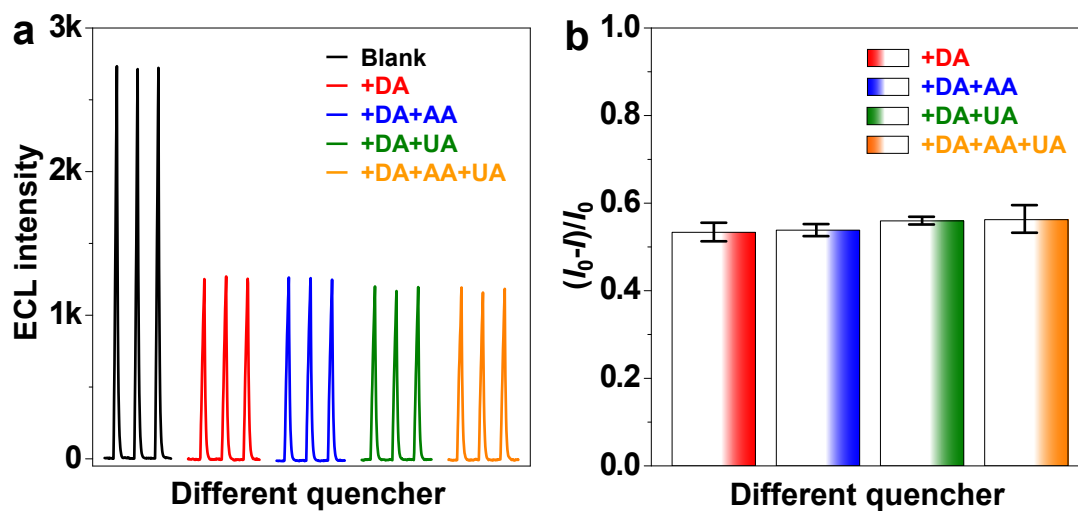

**Figure S20.** (a) ECL intensity and (b)  $(I_0 - I)/I_0$  value of the AIEgen film in the presence of  $1 \times 10^{-11}$  M DA containing 100-fold concentrations of AA, UA, or a mixture of AA and UA.

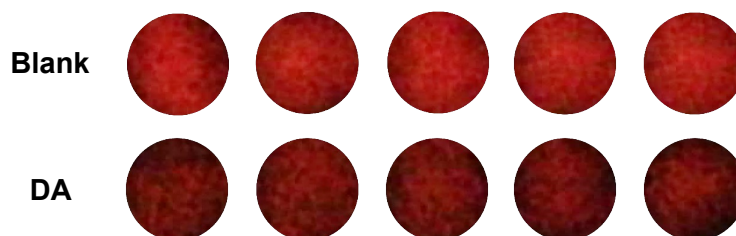

**Figure S21.** ECL images of the AIEgen film (loading:  $156 \text{ ng/mm}^2$ ) on GCFC (20 deposition cycles) in the absence and presence of DA ( $10^{-13}$  M).

**Table S2** Grayscale analysis data of the AIEgen film on GCFC.

| $\lg c_{\text{DA}}$<br>( $\times 10^{-13}$ M) | Grayscale                       | Average<br>value | $(G_0 - G)/G_0$ | $c_{\text{DA}}$<br>( $\times 10^{-13}$ M) | Relative<br>error (%) |
|-----------------------------------------------|---------------------------------|------------------|-----------------|-------------------------------------------|-----------------------|
| 0                                             | 24.0, 23.2, 22.9,<br>21.6, 21.5 | $22.6 \pm 1.08$  | $0.40 \pm 0.03$ | $0.95 \pm 0.50$                           | 5                     |
| 1                                             | 15.1, 14.4, 13.2,<br>12.8, 12.2 | $13.6 \pm 1.02$  |                 |                                           |                       |

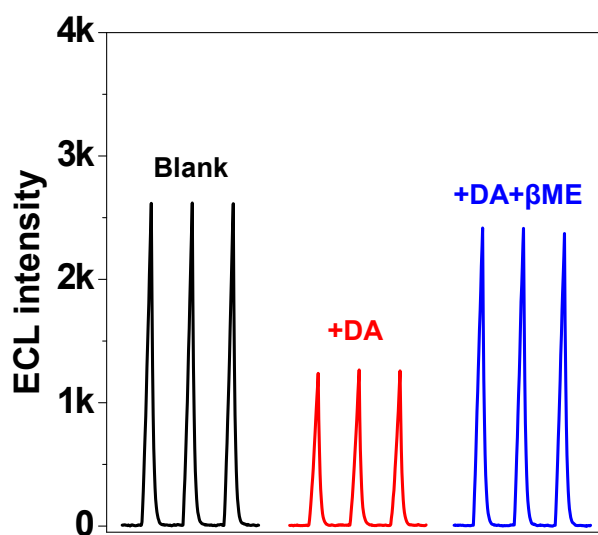

**Figure S22.** ECL intensity of the AIEgen film/TEOA system (black line), with  $1 \times 10^{-11}$  M of DA (red line), with  $1 \times 10^{-11}$  M of DA and  $2 \times 10^{-10}$  M of 2-mercapoethanol ( $\beta$ ME) (blue line), respectively.

## References

- (1) Gu, Y.; Wang, J.; Shi, H.; Pan, M.; Liu, B.; Fang, G.; Wang, S. Electrochemiluminescence sensor based on upconversion nanoparticles and oligoaniline-crosslinked gold nanoparticles imprinting recognition sites for the determination of dopamine. *Biosens. Bioelectron.* **2019**, *128*, 129-136.
- (2) Tian, L.; Wang, X.; Wu, K.; Hu, Y.; Wang, Y.; Lu, J. Ultrasensitive electrochemiluminescence biosensor for dopamine based on ZnSe, graphene oxide@multi walled carbon nanotube and Ru(bpy)<sub>3</sub><sup>2+</sup>. *Sensor Actuat. B-Chem.* **2019**, *286*, 266-271.
- (3) Wang, Z.; Wang, X.; Zhu, X.; Lv, J.; Zhang, J.; Zhu, Q.; Dai, Z. Fabrication of non-destructive and enhanced electrochemiluminescence interface for reusable detection of cell-released dopamine. *Sensor Actuat. B-Chem.* **2019**, *285*, 438-444.
- (4) Wang, H. M.; Wang, C. C.; Wang, A. J.; Zhang, L.; Luo, X.; Yuan, P. X.; Feng, J. J. Green synthesis of Pd nanocones as a novel and effective electrochemiluminescence illuminant for highly sensitive detection of dopamine. *Sensor Actuat. B-Chem.* **2019**, *281*, 588-594.
- (5) Peng, H.; Liu, P.; Wu, W.; Chen, W.; Meng, X.; Lin, X.; Liu, A. Facile electrochemiluminescence sensing platform based on water-soluble tungsten oxide quantum dots for ultrasensitive detection of dopamine released by cells. *Anal. Chim. Acta* **2019**, *1065*, 21-28.
- (6) Cui, L.; Yu, S.; Gao, W.; Zhang, X.; Deng, S.; Zhang, C.-y. Tetraphenylthene-Based Conjugated Microporous Polymer for Aggregation-Induced Electrochemiluminescence. *ACS Appl. Mater. Interfaces* **2020**, *12*, 7966-7973.
- (7) Zhuang, X.; Gao, X.; Tian, C.; Cui, D.; Luan, F.; Wang, Z.; Xiong, Y.; Chen, L. Synthesis of europium(iii)-doped copper nanoclusters for electrochemiluminescence bioanalysis. *Chem. Commun.* **2020**, *56*, 5755-5758.
- (8) Bushira, F. A.; Kitte, S. A.; Xu, C.; Li, H.; Zheng, L.; Wang, P.; Jin, Y. Two-Dimensional-Plasmon-Boosted Iron Single-Atom Electrochemiluminescence for the Ultrasensitive Detection of Dopamine, Hemin, and Mercury. *Anal. Chem.* **2021**, *93*, 9949-9957.



- (9) Ding, H.; Guo, W.; Zhou, P.; Su, B. Nanocage-confined electrochemiluminescence for the detection of dopamine released from living cells. *Chem. Commun.* **2020**, *56*, 8249-8252.
- (10) Bushira, F. A.; Wang, P.; Jin, Y. High-Entropy Oxide for Highly Efficient Luminol-Dissolved Oxygen Electrochemiluminescence and Biosensing Applications. *Anal. Chem.* **2022**, *94*, 2958-2965.
- (11) Yan, M.; Xin, J.; Fan, L.; Ye, J.; Xiao, T.; Huang, J.; Yang, X. Electrochemistry and Electrochemiluminescence of Coumarin Derivative Microrods: Mechanism Insights. *Anal. Chem.* **2021**, *93*, 3461-3469.
- (12) Liu, J.-L.; Zhang, J.-Q.; Zhou, Y.; Xiao, D.-R.; Zhuo, Y.; Chai, Y.-Q.; Yuan, R. Crystallization-Induced Enhanced Electrochemiluminescence from Tetraphenyl Alkene Nanocrystals for Ultrasensitive Sensing. *Anal. Chem.* **2021**, *93*, 10890-10897.
- (13) Nie, Y.; Tao, X.; Zhou, Y.; Yuan, X.; Zhuo, Y.; Chai, Y.-q.; Yuan, R. Kill Three Birds with One Stone: Poly(3,4-ethylenedioxythiophene)-Hosted Ag Nanoclusters with Boosted Cathodic Electrochemiluminescence for Biosensing Application. *Anal. Chem.* **2021**, *93*, 1120-1125.
- (14) Qin, Y.; Wang, Z.; Xu, J.; Han, F.; Zhao, X.; Han, D.; Liu, Y.; Kang, Z.; Niu, L. Carbon Nitride Quantum Dots Enhancing the Anodic Electrochemiluminescence of Ruthenium(II) Tris(2,2'-bipyridyl) via Inhibiting the Oxygen Evolution Reaction. *Anal. Chem.* **2020**, *92*, 15352-15360.
